# Supplementary material
Source: PubMed Central journal article supplement (PMC1630438)

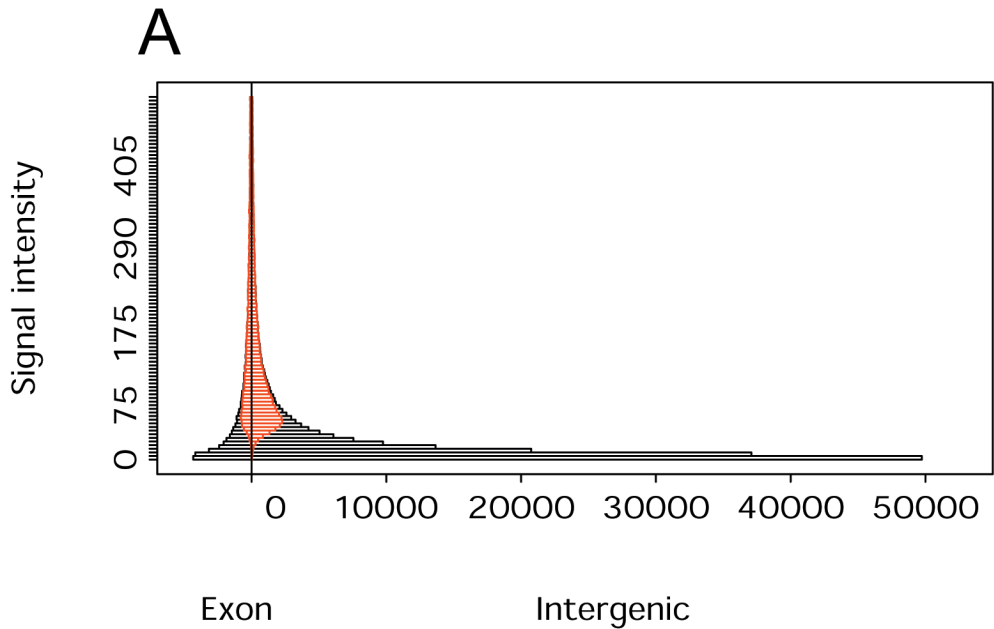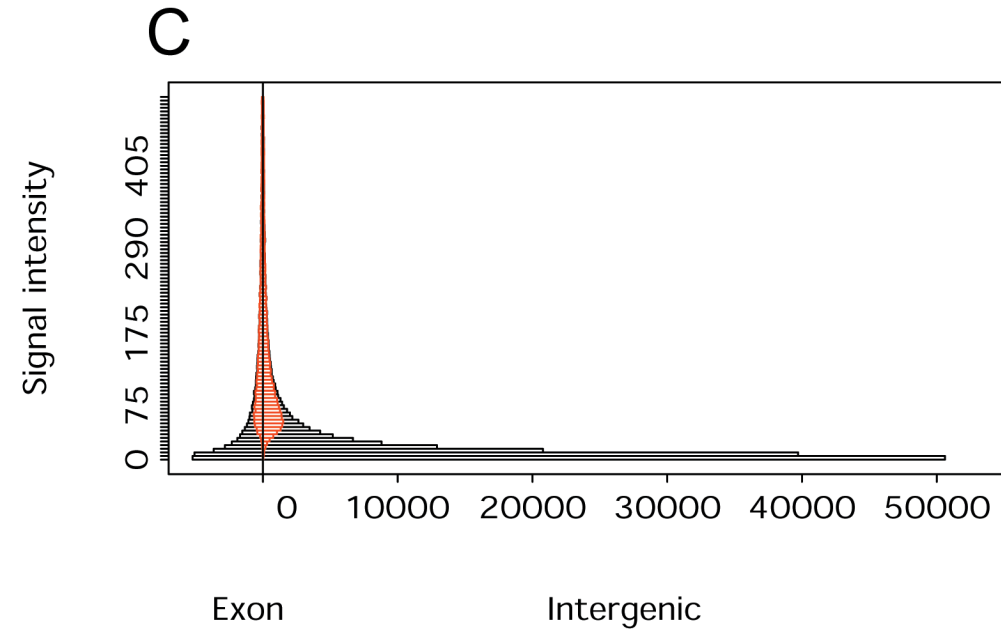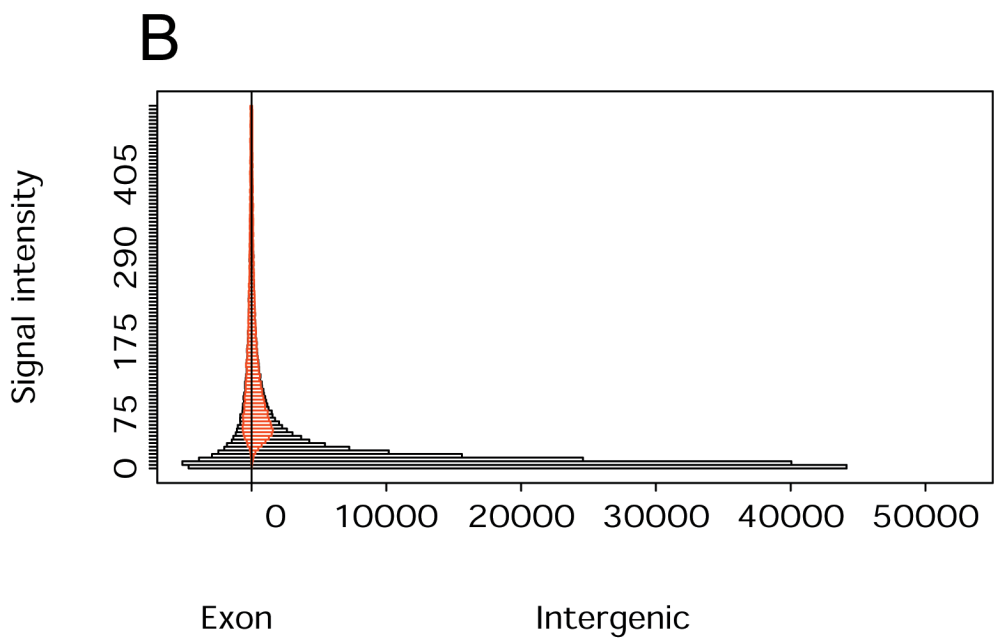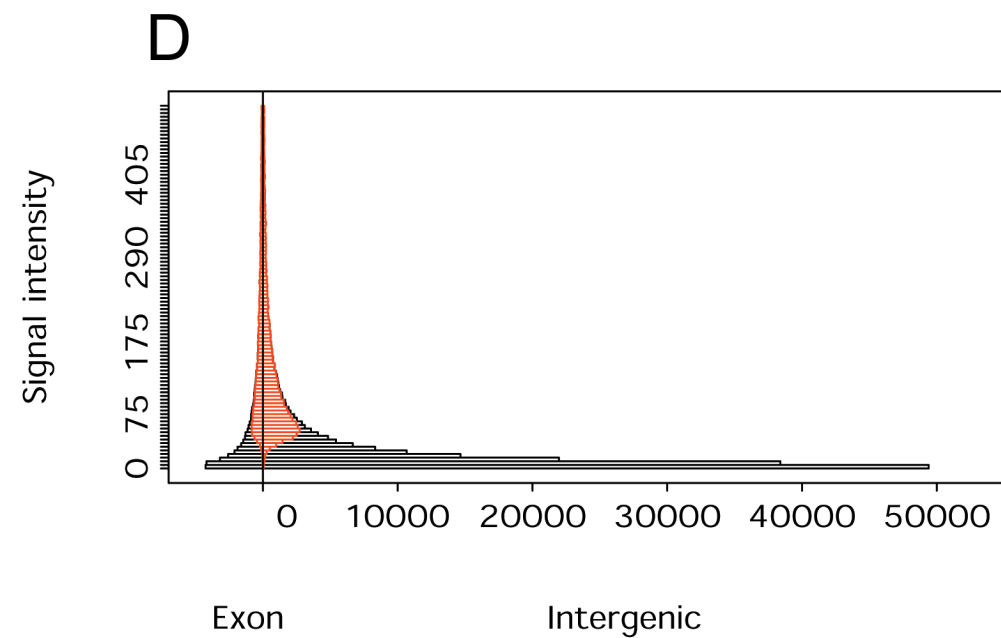

Supplement: pgen.0020171.sg001.pdf [file pgen.0020171.sg001.pdf]

**A**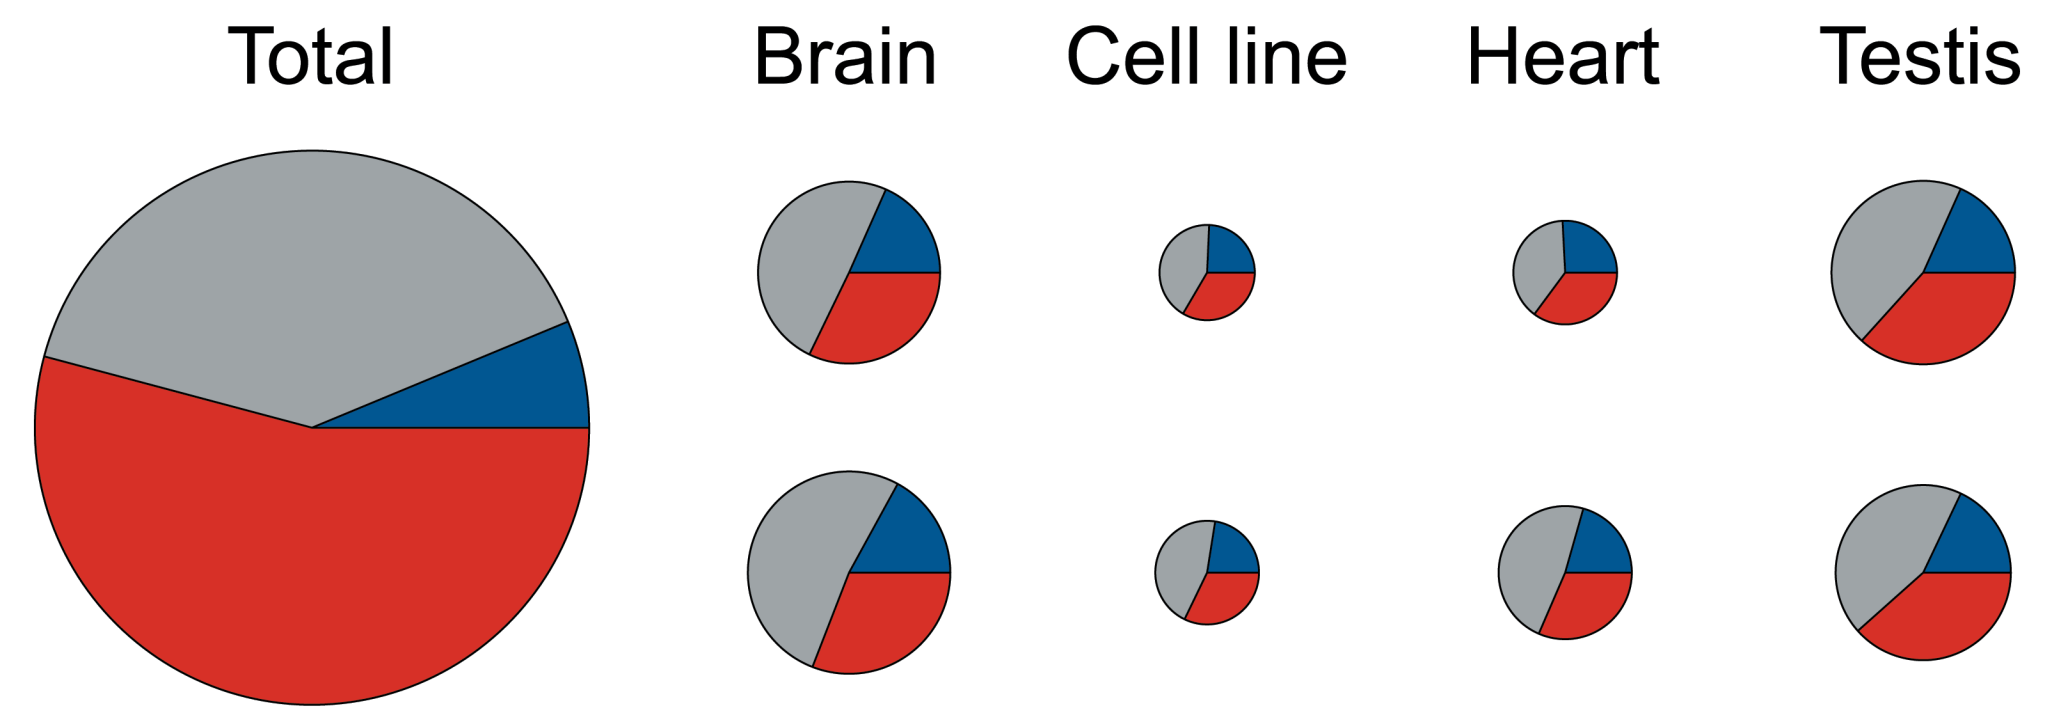**B**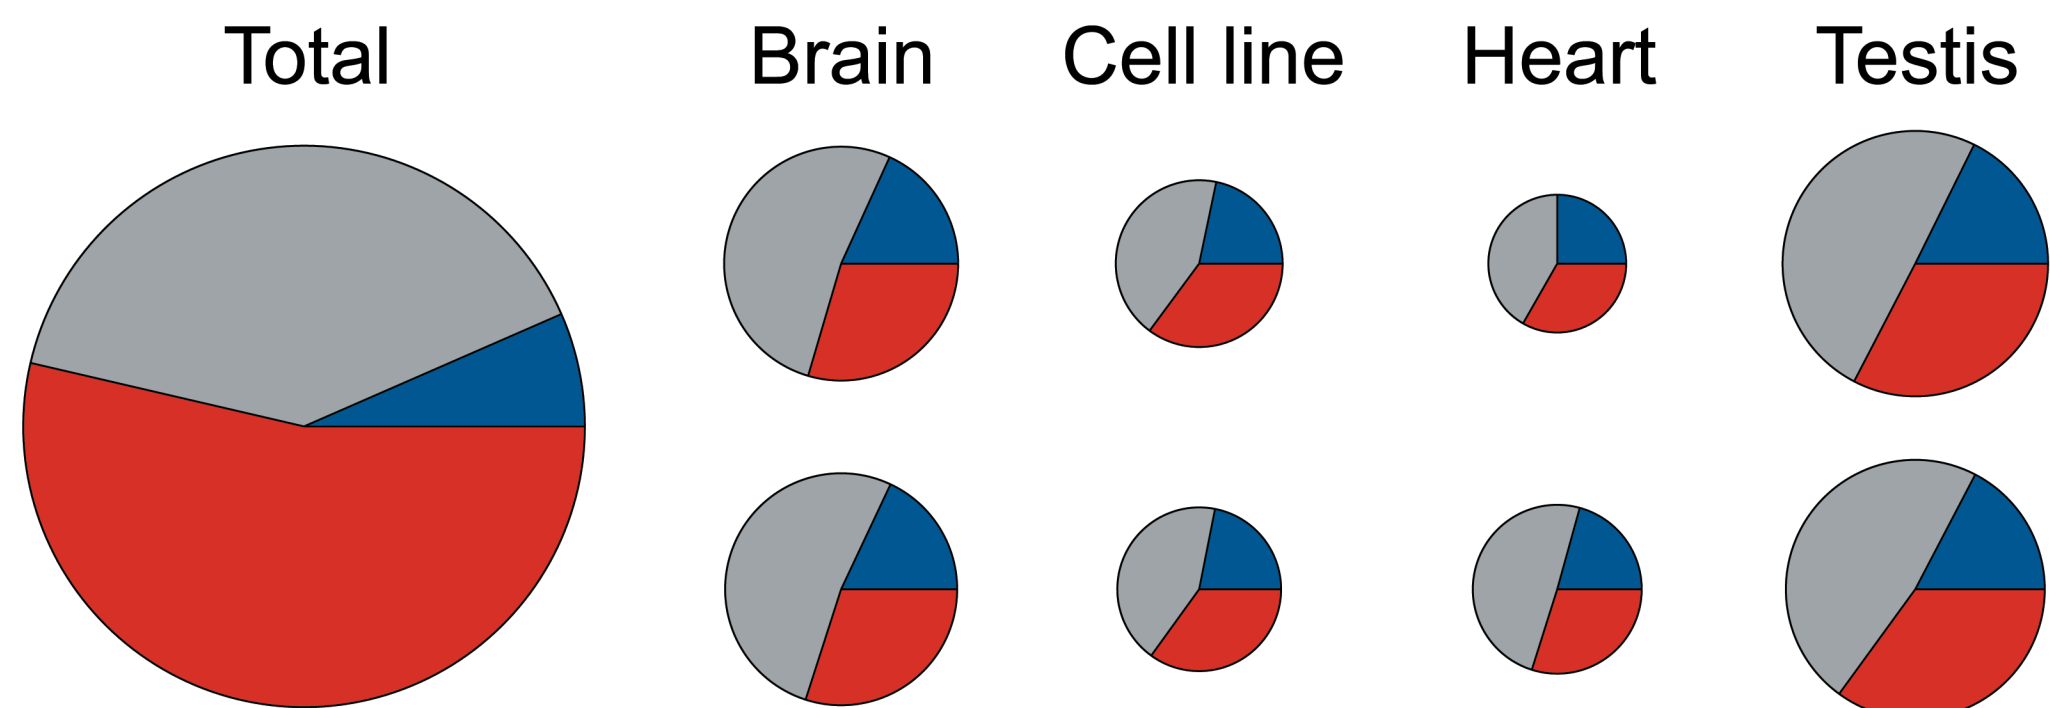

Supplement: pgen.0020171.sg002.pdf [file pgen.0020171.sg002.pdf]

**A**

Signal intensity

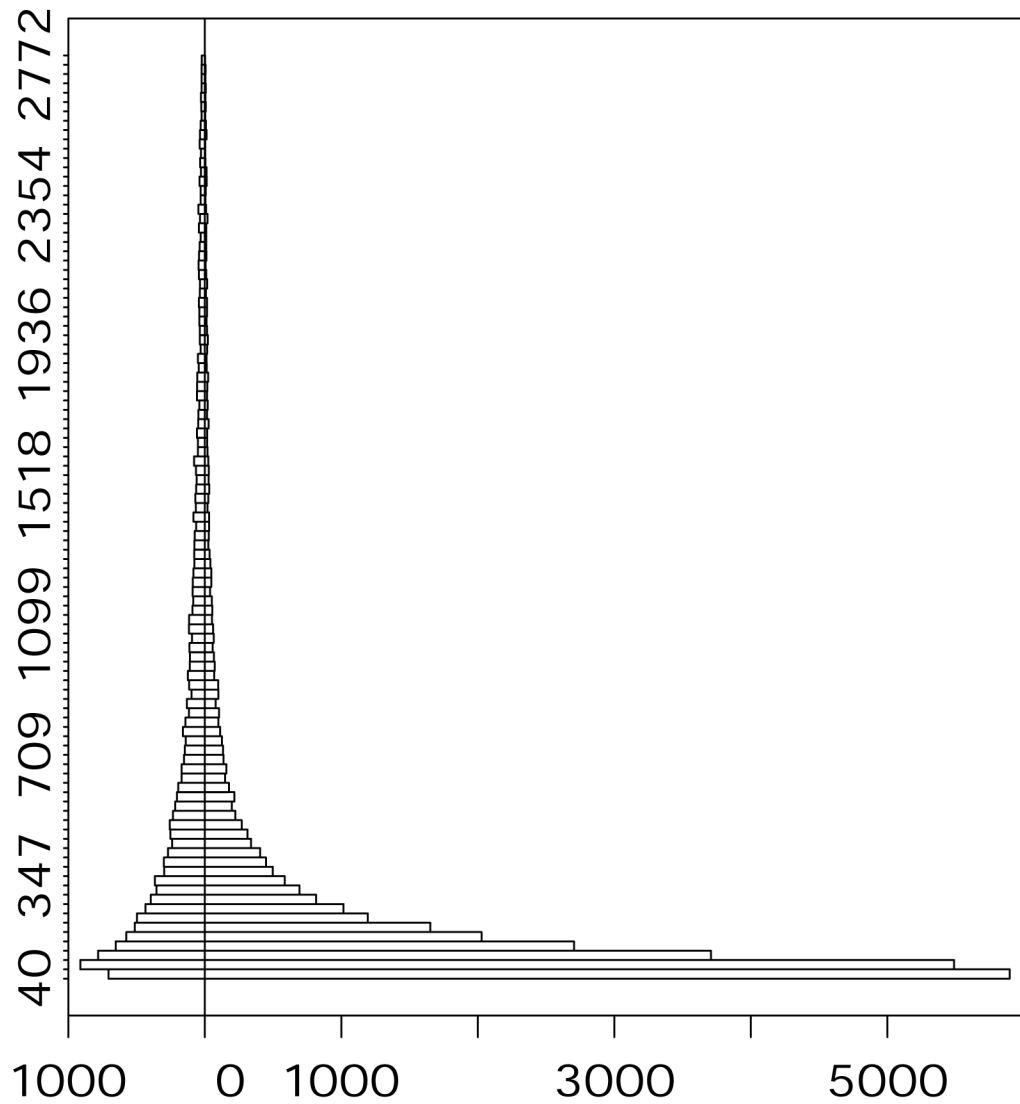

Exons

Intergenic

**B**

Signal intensity

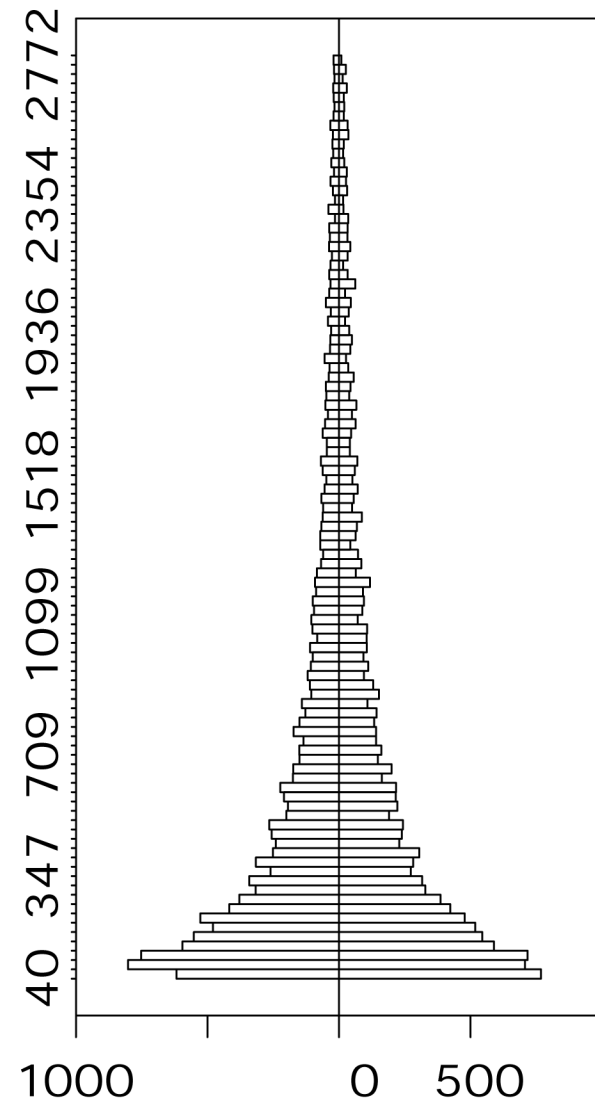

Exons

Intergenic

Supplement: pgen.0020171.sg003.pdf [file pgen.0020171.sg003.pdf]

**A**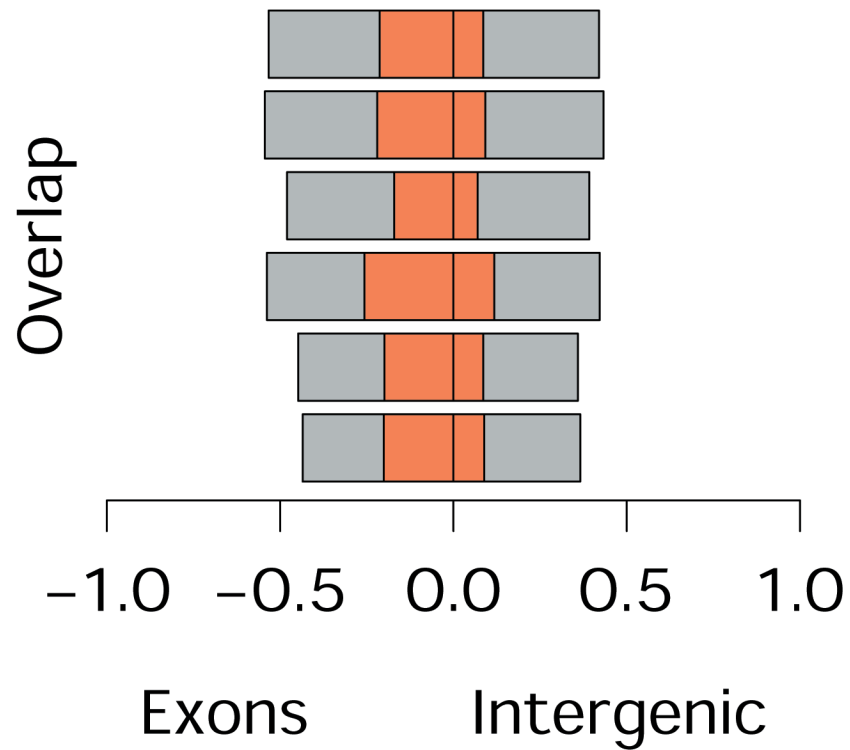**B**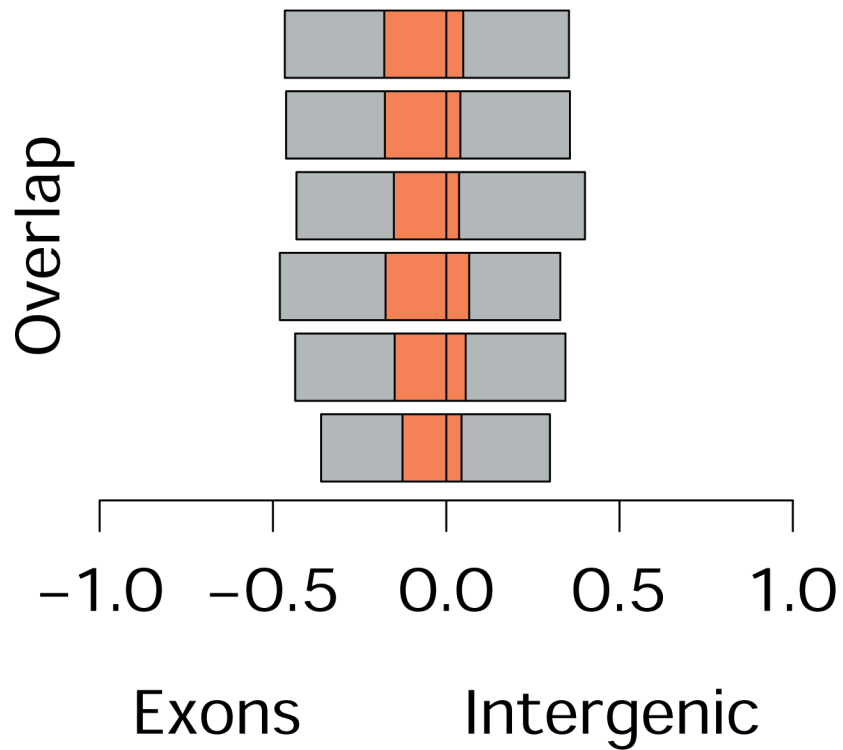

Supplement: pgen.0020171.sg004.pdf [file pgen.0020171.sg004.pdf]

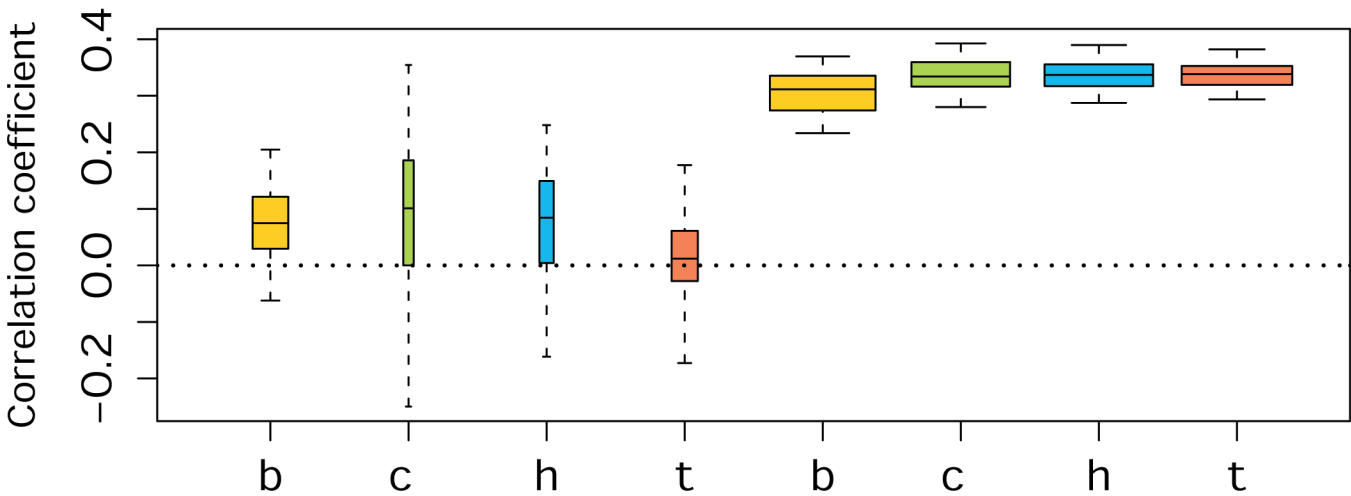

Supplement: pgen.0020171.sg006.pdf [file pgen.0020171.sg006.pdf]

log fold change

4  
2  
0  
-2  
-4  
-6

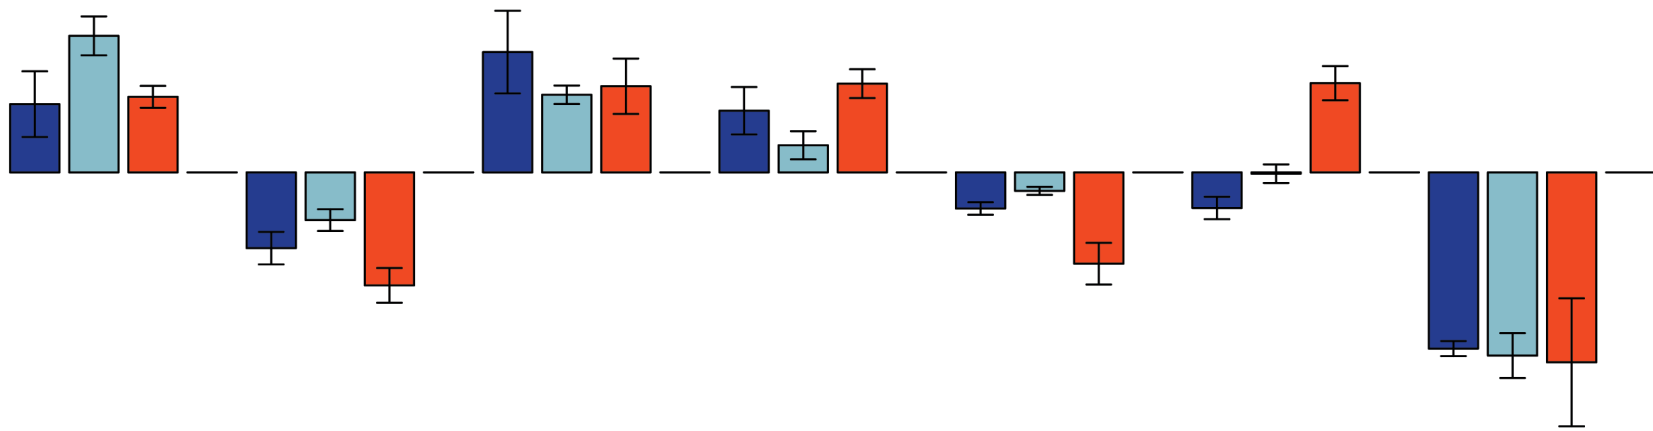

transcribed regions

Supplement: pgen.0020171.sg007.pdf [file pgen.0020171.sg007.pdf]

Conservation

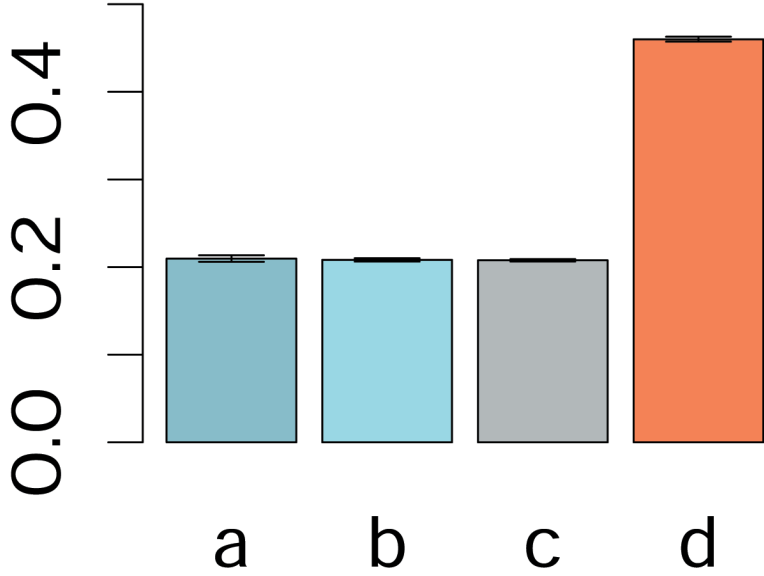

Supplement: pgen.0020171.sg008.pdf [file pgen.0020171.sg008.pdf]

**A**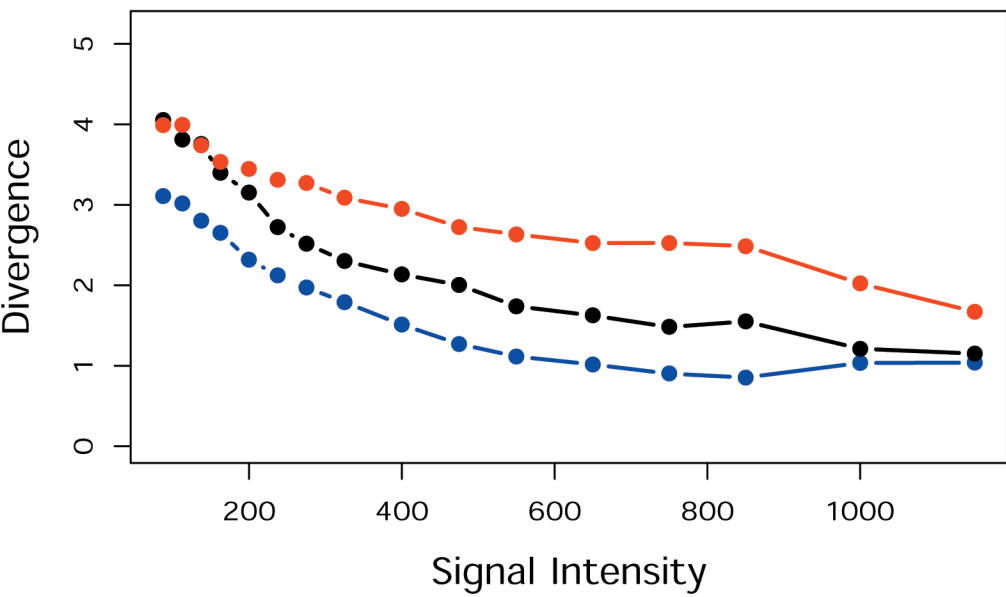**B**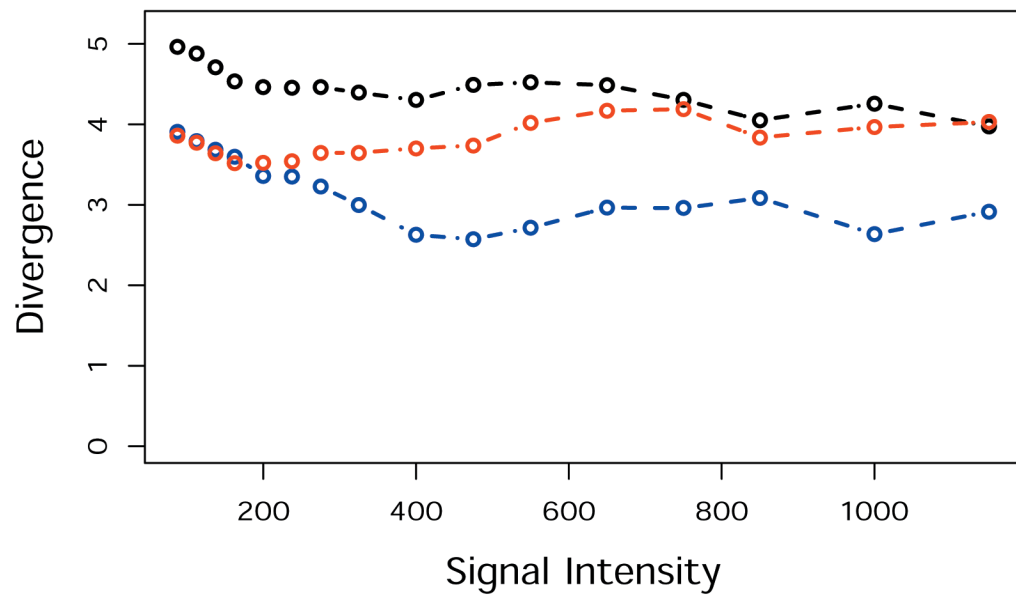**C**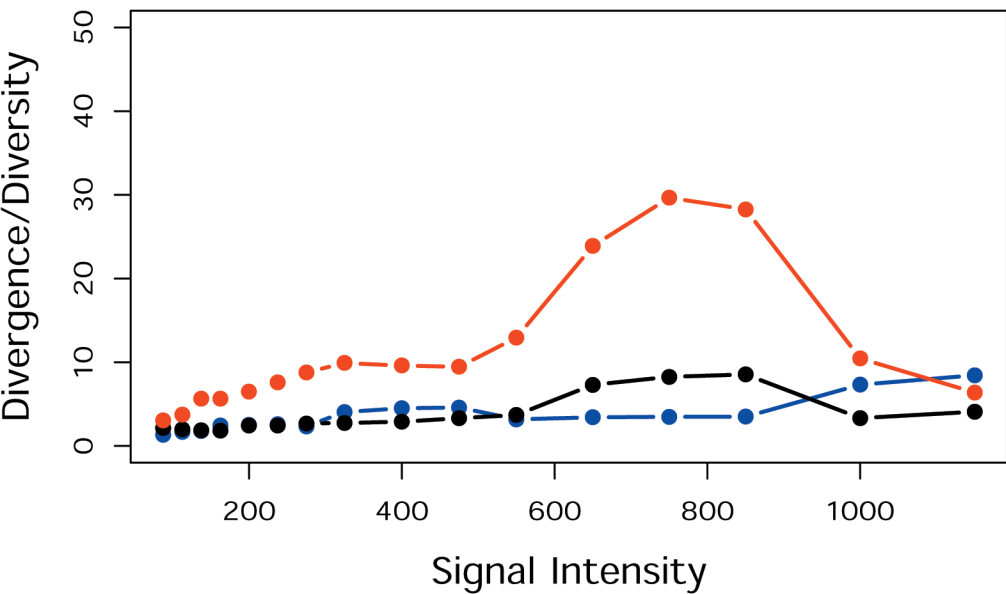**D**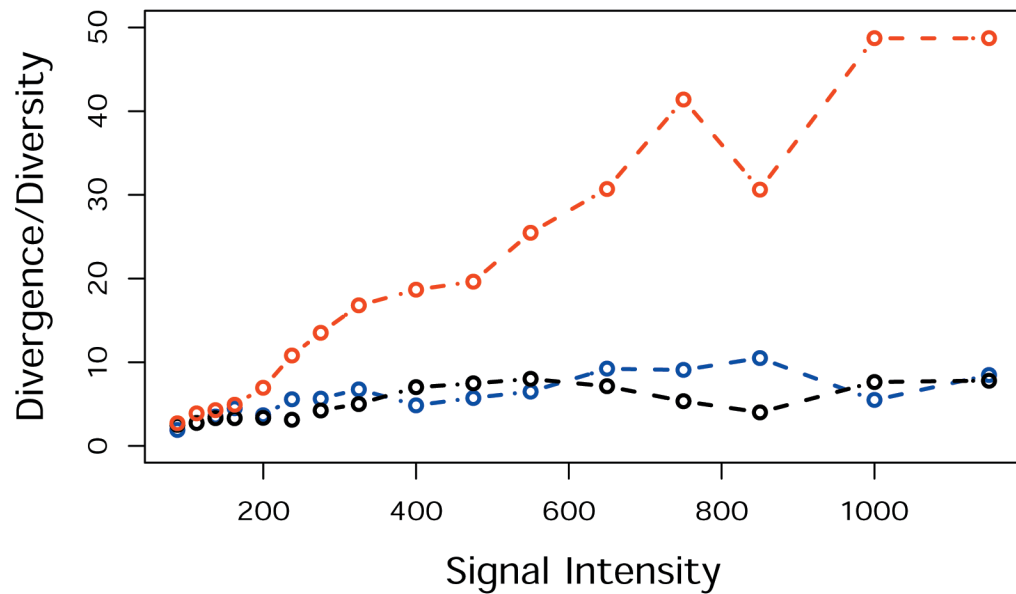

Supplement: pgen.0020171.sg009.pdf [file pgen.0020171.sg009.pdf]

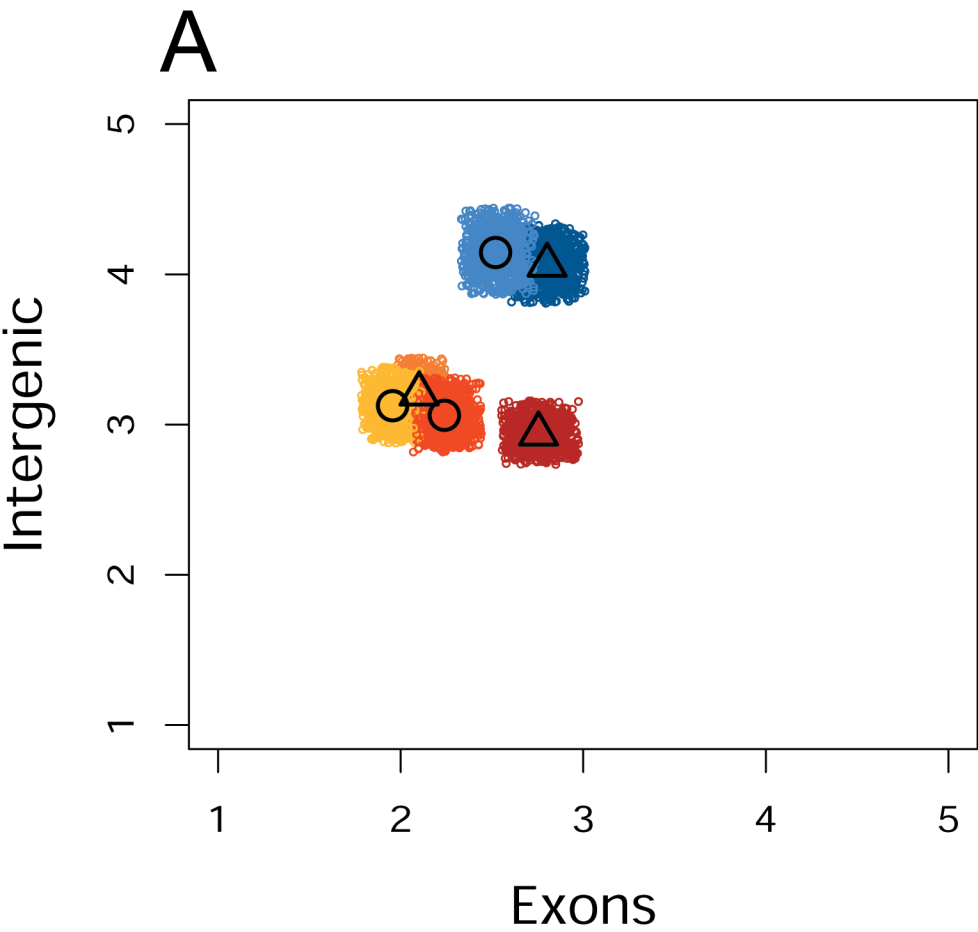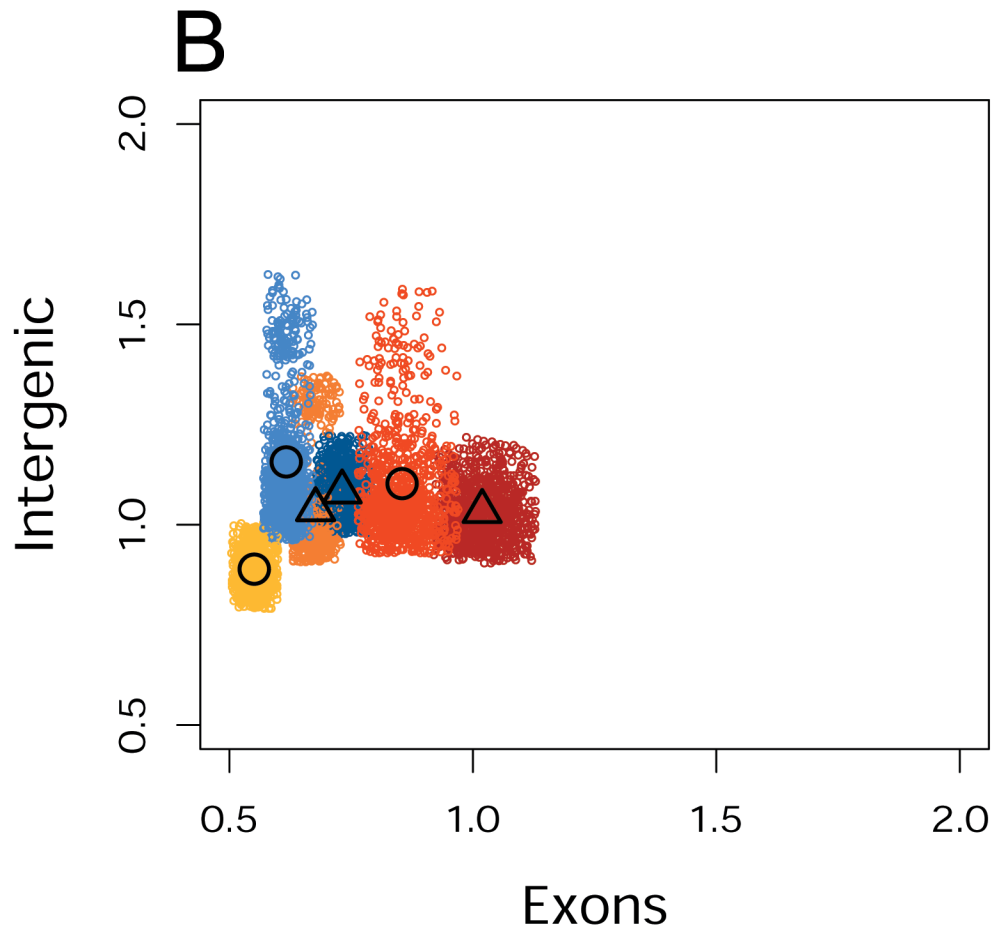

Supplement: pgen.0020171.sg010.pdf [file pgen.0020171.sg010.pdf]
